# Supplementary material for: An integrated quantitative structure and mechanism of action-activity relationship model of human serum albumin binding
Source: PubMed Central journal article supplement (PMC6551915; doi:10.1186/s13321-019-0359-2), 2019-06-06
Supplement: 13321_2019_359_MOESM5_ESM.pdf [file 13321_2019_359_MOESM5_ESM.pdf]

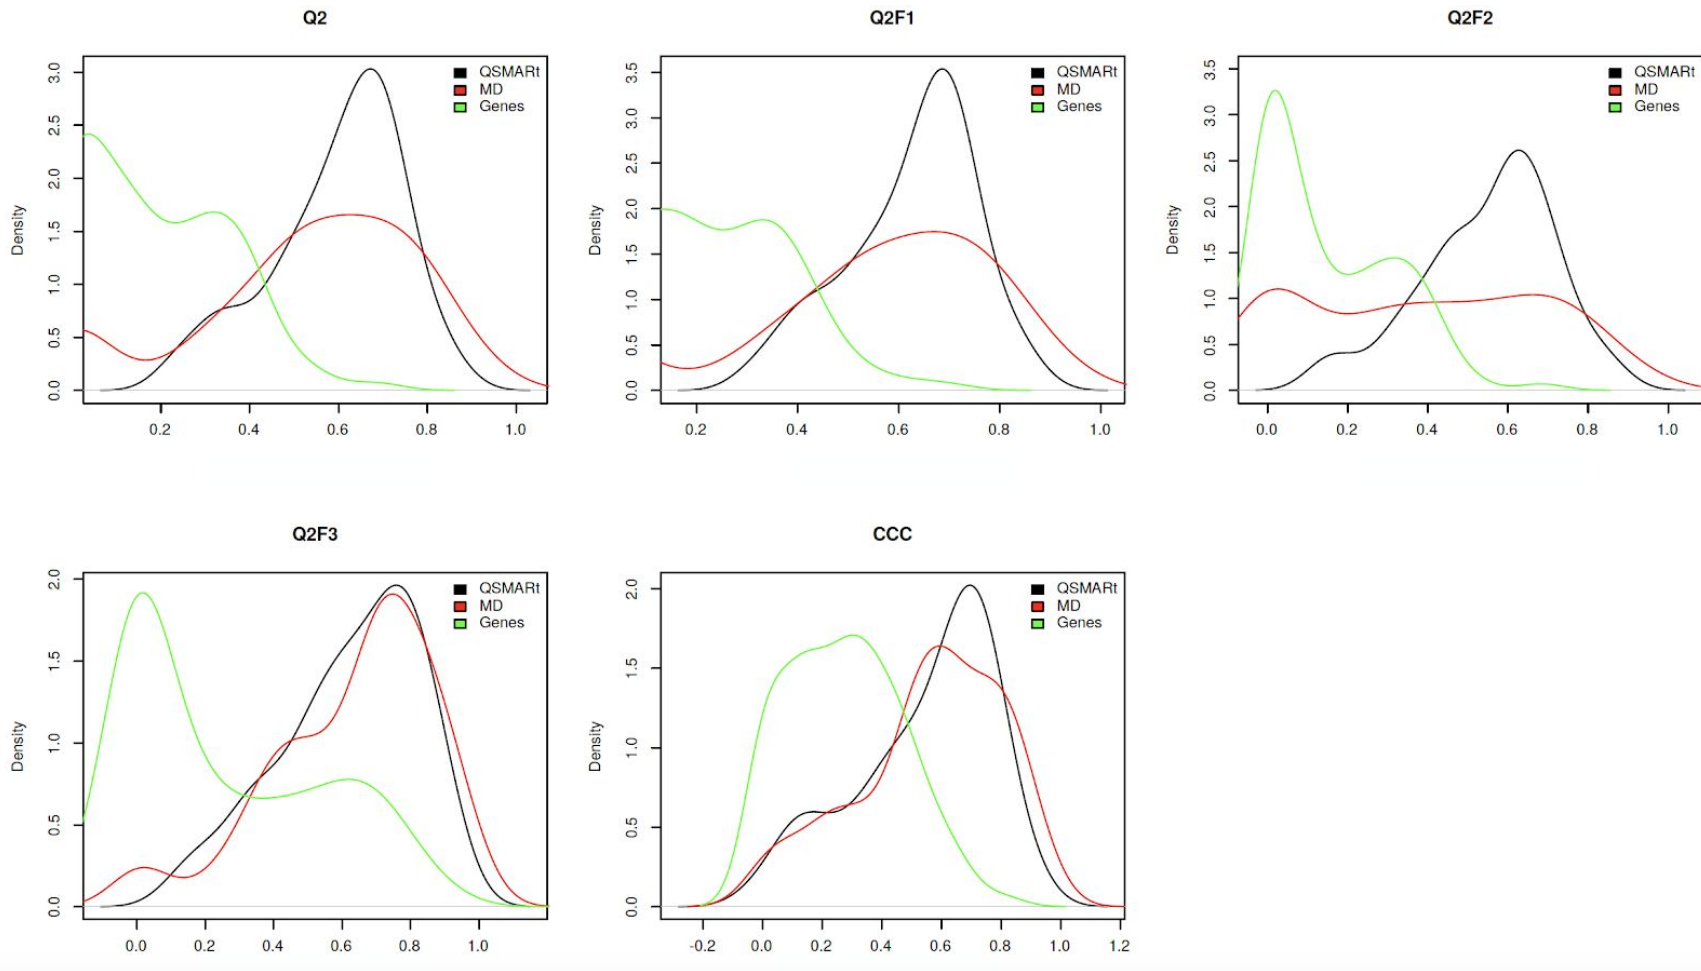

Figure S2: distributions of the  $Q^2$ ,  $Q^2F_1$ ,  $Q^2F_2$ ,  $Q^2F_3$  and CCC metrics computed by 100 repetitions of the RSVA method for the QSMARt model and the model obtained by using only the genes and MDs values.
