# Supplementary material for: An integrated quantitative structure and mechanism of action-activity relationship model of human serum albumin binding
Source: PubMed Central journal article supplement (PMC6551915; doi:10.1186/s13321-019-0359-2), 2019-06-06
Supplement: 13321_2019_359_MOESM6_ESM.pdf [file 13321_2019_359_MOESM6_ESM.pdf]

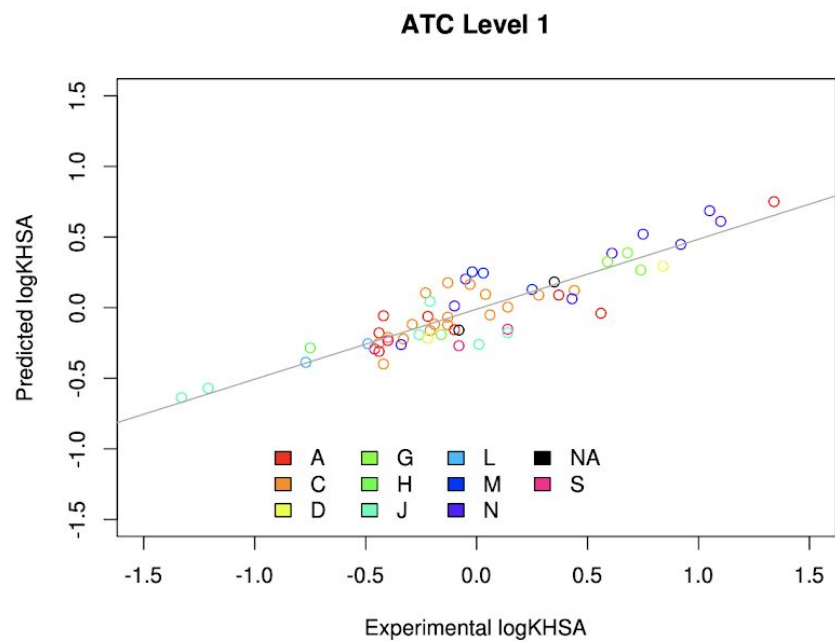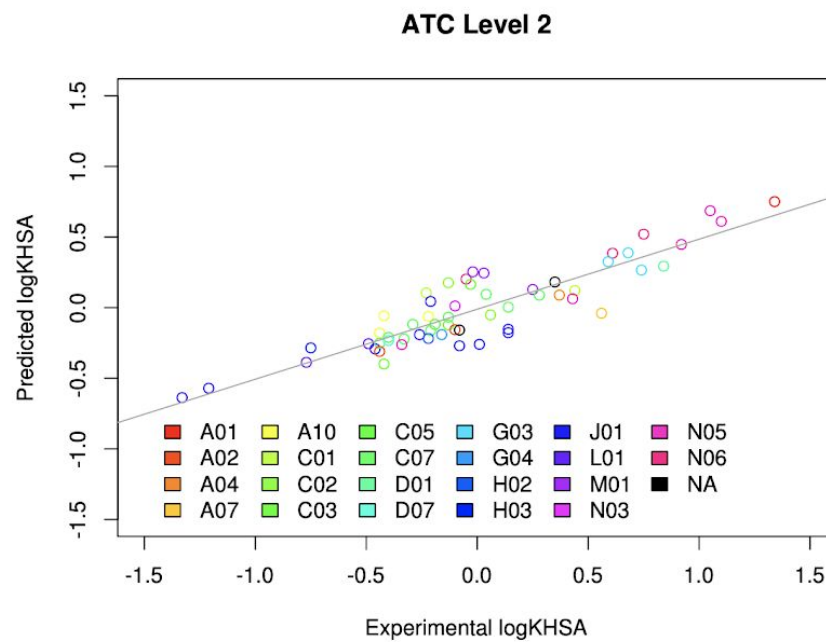

Figure S3: Predicted  $\log K_{HSA}$  versus experimental  $\log K_{HSA}$  values of the 59 drugs coloured by ATC code level 1 and level 2
