# Supplementary material for: An integrated quantitative structure and mechanism of action-activity relationship model of human serum albumin binding
Source: PubMed Central journal article supplement (PMC6551915; doi:10.1186/s13321-019-0359-2), 2019-06-06
Supplement: 13321_2019_359_MOESM8_ESM.pdf [file 13321_2019_359_MOESM8_ESM.pdf]

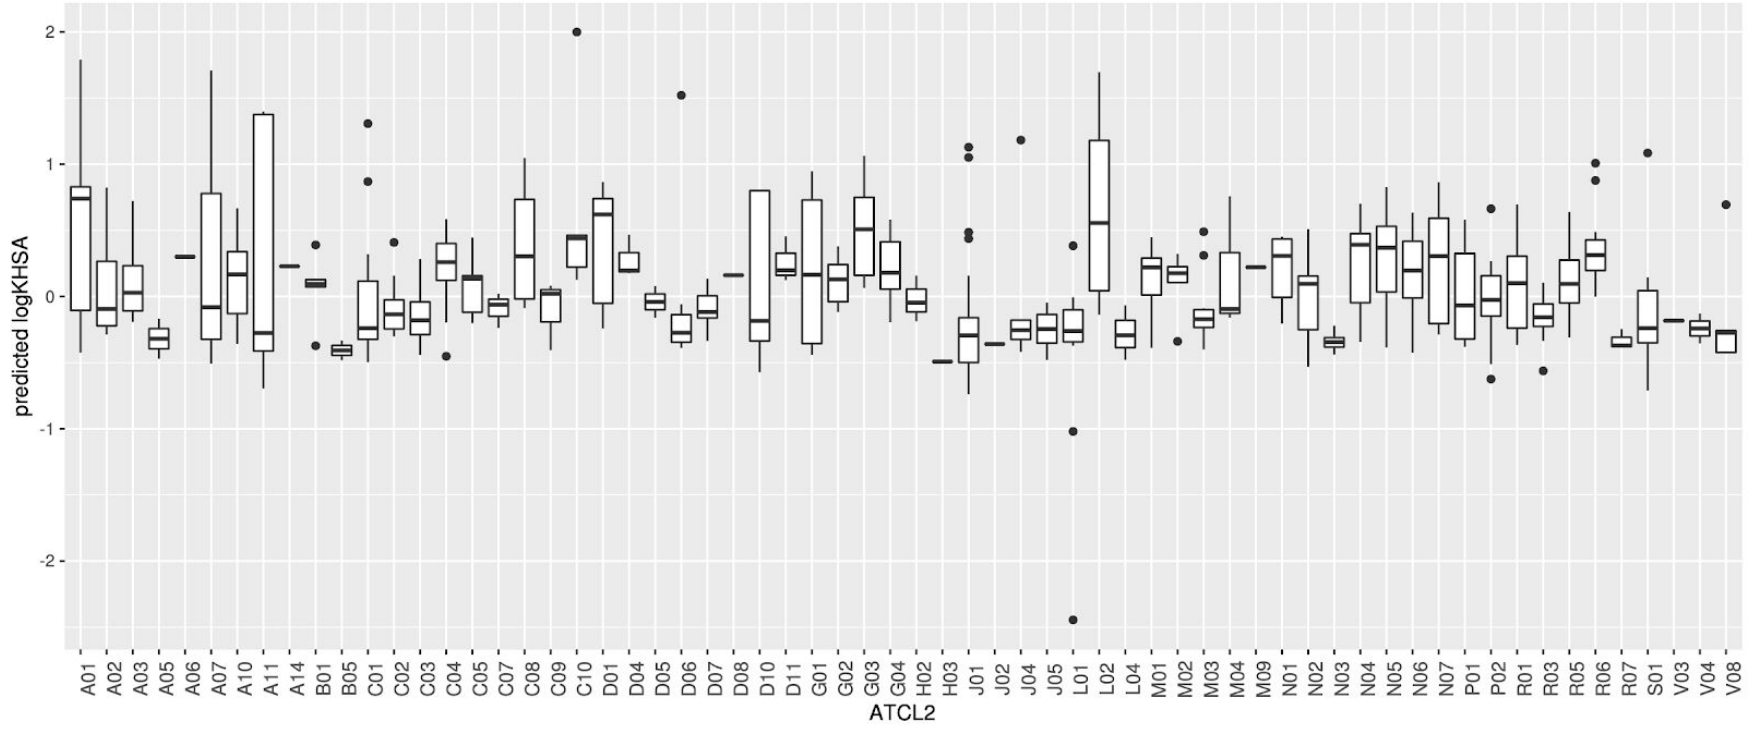

Fig S5: Predicted  $\log K_{HSA}$  values for the external 799 compounds in the CMap dataset grouped by ATC code level 2.
