# Supplementary material for: An integrated quantitative structure and mechanism of action-activity relationship model of human serum albumin binding
Source: PubMed Central journal article supplement (PMC6551915; doi:10.1186/s13321-019-0359-2), 2019-06-06
Supplement: 13321_2019_359_MOESM9_ESM.pdf [file 13321_2019_359_MOESM9_ESM.pdf]

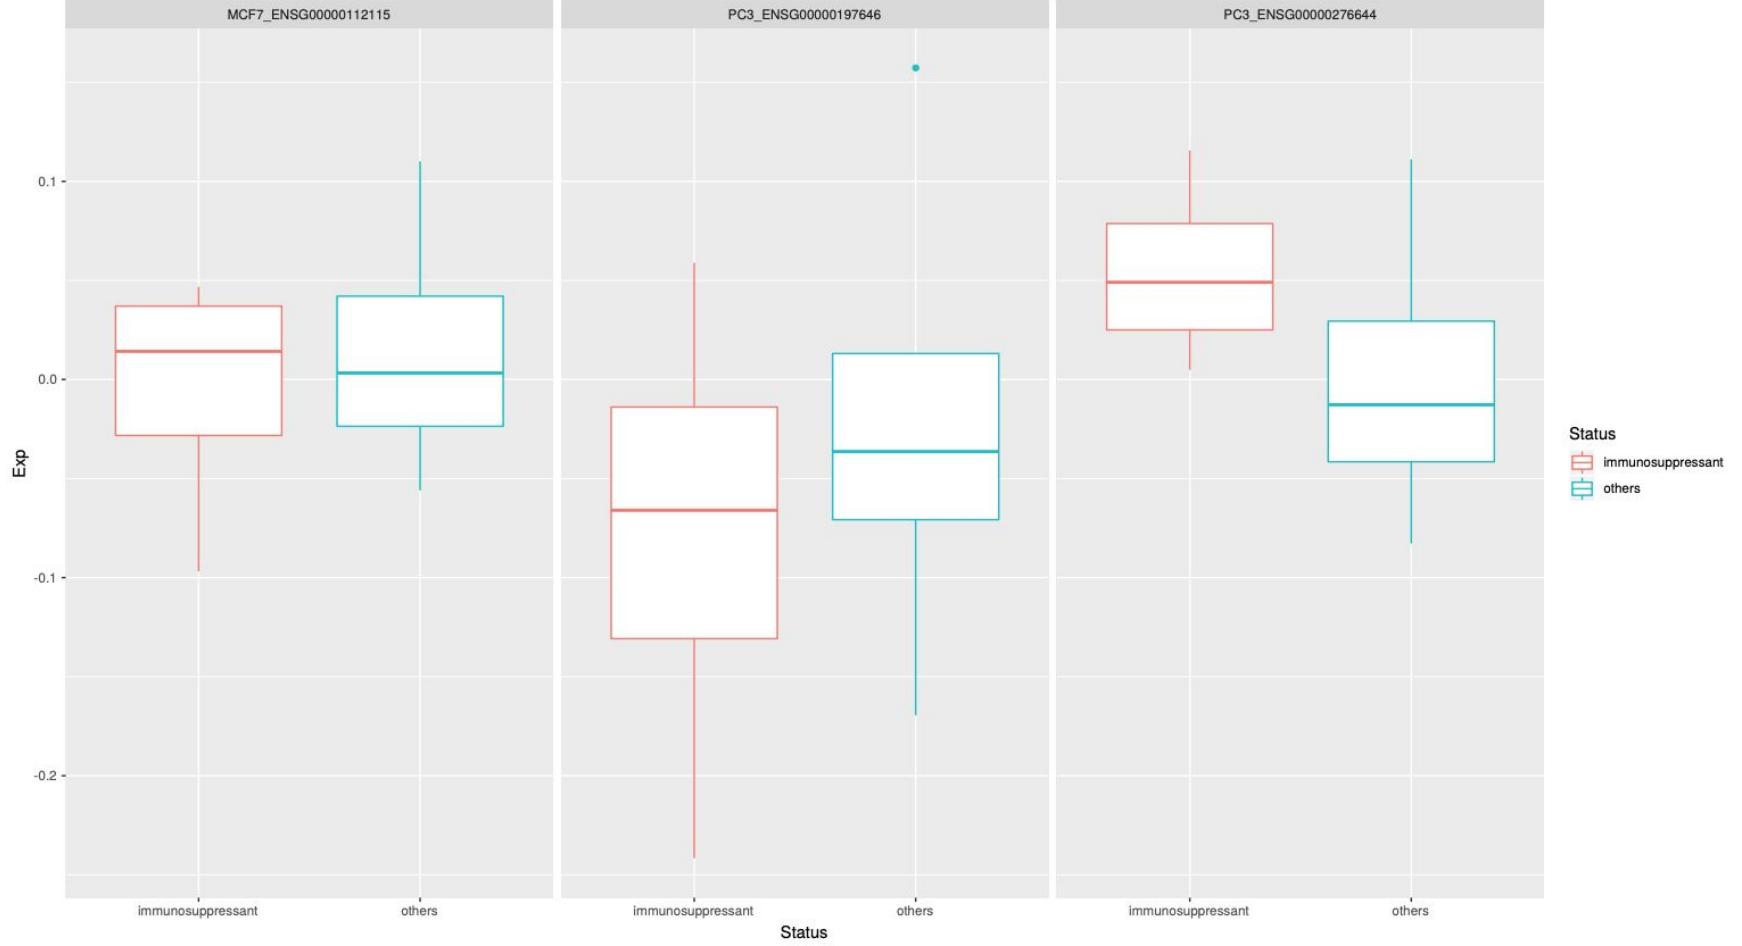

Fig S6: Expression values of the three genes included in the QSAMRt model for immunosuppressant and their most dissimilar drugs in the external set coming from the CMap dataset
